# Supplementary material for: Chemical composition and light absorption of carbonaceous aerosols emitted from crop residue burning: Influence of combustion efficiency
Source: Copernicus journal article supplement (doi:10.5194/acp-2020-676), 2020-07-28
Supplement: Supplementary file 1 [file acp-2020-676-supplement.pdf]

## Supplement for

# Chemical composition and light absorption of carbonaceous aerosols emitted from crop residue burning: Influence of combustion efficiency

Yujue Wang,<sup>1</sup> Min Hu,<sup>\*,1,2,4</sup> Nan Xu,<sup>1</sup> Yanhong Qin,<sup>1</sup> Zhijun Wu,<sup>1,2</sup> Liwu Zeng,<sup>3</sup> Xiaofeng Huang,<sup>3</sup> Lingyan He<sup>3</sup>

<sup>1</sup>State Key Joint Laboratory of Environmental Simulation and Pollution Control, College of Environmental Sciences and Engineering, Peking University, Beijing 100871, China

<sup>2</sup>Collaborative Innovation Center of Atmospheric Environment and Equipment Technology, Nanjing University of Information Science & Technology, Nanjing, China

<sup>3</sup>Key Laboratory for Urban Habitat Environmental Science and Technology, School of Environment and Energy, Peking University Shenzhen Graduate School, Shenzhen, China

<sup>4</sup>Beijing Innovation Center for Engineering Sciences and Advanced Technology, Peking University, Beijing 100871, China

Correspondence to: Min Hu ([minhu@pku.edu.cn](mailto:minhu@pku.edu.cn))

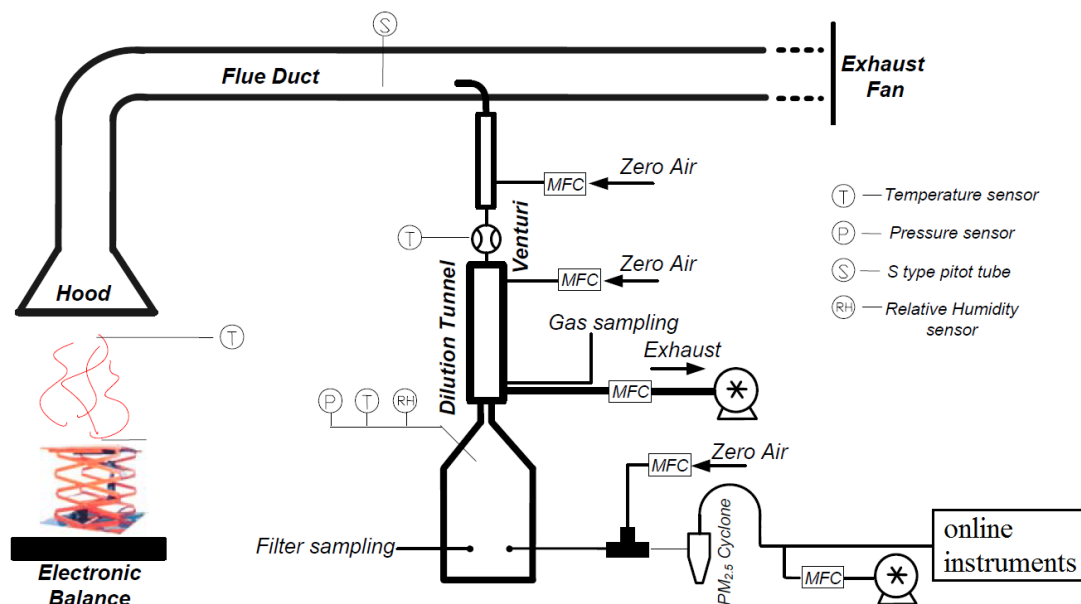

Figure S1 Scheme of the biomass burning simulation system (He et al., 2010).

Table S1 Burning conditions, including biofuel types, moisture contents and modified combustion efficiency (MCE), of simulated biomass burning experiments in this study

| Types of biomass fuels | Moisture content |     | MCE  |
|------------------------|------------------|-----|------|
| Corn                   | low level        | 13% | 0.83 |
|                        |                  | 13% | 0.82 |
|                        |                  | 13% | 0.82 |
|                        | high level       | 18% | 0.80 |
|                        |                  | 18% | 0.80 |
|                        |                  | 18% | 0.75 |
| Wheat                  | low level        | 7%  | 0.77 |
|                        |                  | 7%  | 0.79 |
|                        |                  | 7%  | 0.79 |
|                        |                  | 9%  | 0.83 |
|                        |                  | 9%  | 0.79 |
|                        |                  | 9%  | /    |
|                        | medium level     | 18% | 0.76 |
|                        |                  | 18% | 0.82 |
|                        |                  | 18% | 0.82 |
|                        |                  | 22% | 0.81 |
|                        |                  | 22% | 0.77 |
|                        |                  | 22% | 0.76 |
|                        | high level       | 27% | 0.77 |
|                        |                  | 27% | 0.74 |
|                        |                  | 27% | 0.69 |
|                        |                  | 33% | 0.69 |
|                        |                  | 33% | 0.68 |
|                        |                  | 33% | 0.72 |

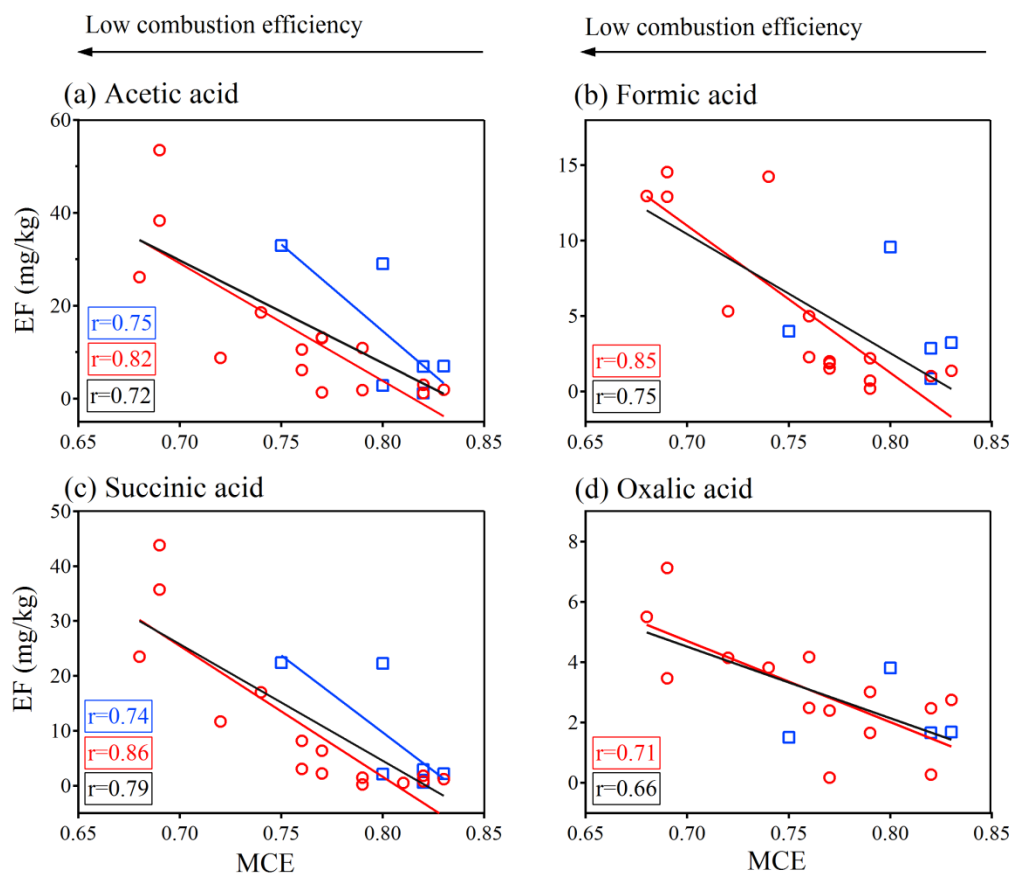

Figure S2 Emission factors of low molecular weight organic acids (acetic acid, formic acid, succinic acid, and oxalic acid) as a function of combustion efficiency. Corn and wheat burning emissions are denoted by red and blue color, respectively. The r values in each panel are the correlation coefficients between emission factors and MCE for corn (blue), wheat (red) and overall (black) burning experiments.

## References

He, L. Y., Lin, Y., Huang, X. F., Guo, S., Xue, L., Su, Q., Hu, M., Luan, S. J., and Zhang, Y. H.: Characterization of high-resolution aerosol mass spectra of primary organic aerosol emissions from Chinese cooking and biomass burning, *Atmos. Chem. Phys.*, 10, 11535-11543, 10.5194/acp-10-11535-2010, 2010.
